# Supplementary material for: Re-dispersion of Pd-based bimetallic catalysts by hydrothermal treatment for CO oxidation
Source: Royal Society of Chemistry journal article supplement (doi:10.1039/d0ra09912k), 2021-01-01
Supplement: d0ra09912k1.pdf [file d0ra09912k1.pdf]

## **Re-Dispersion of Pd-based Bimetallic Catalysts by Hydrothermal Treatment for CO Oxidation**

Min Suk Choi<sup>a</sup>, Hojin Jeong<sup>a</sup>, and Hyunjoo Lee<sup>a\*</sup>

<sup>a</sup> Department of Chemical and Biomolecular Engineering, Korea Advanced Institute of  
Science and Technology, Daejeon 34141, South Korea

Additional data;

Table S1-S2

Figure S1-S9

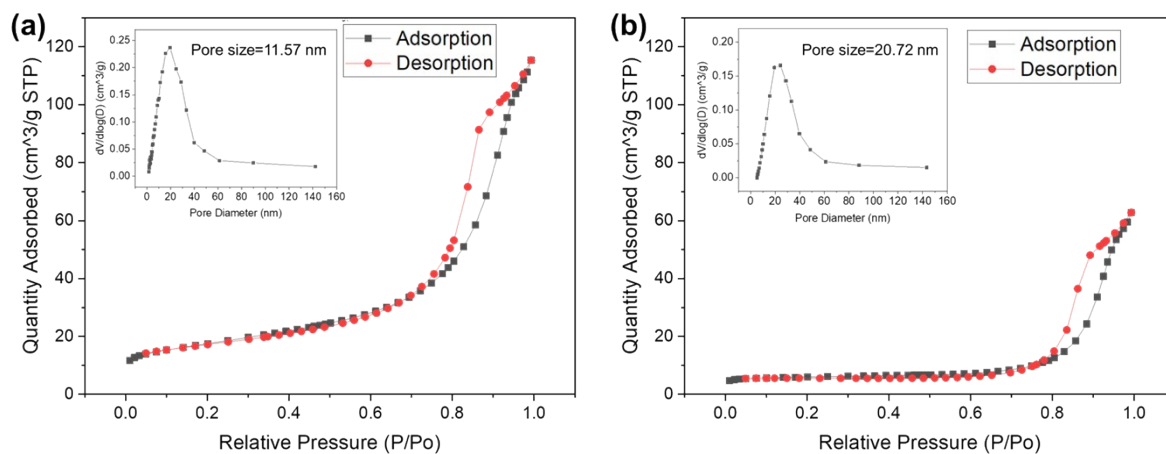

**Figure S1.**  $N_2$  adsorption-desorption isotherms and pore size distributions of (a) as-made and (b) hydrothermal treated PdFe/CeO<sub>2</sub> catalysts.

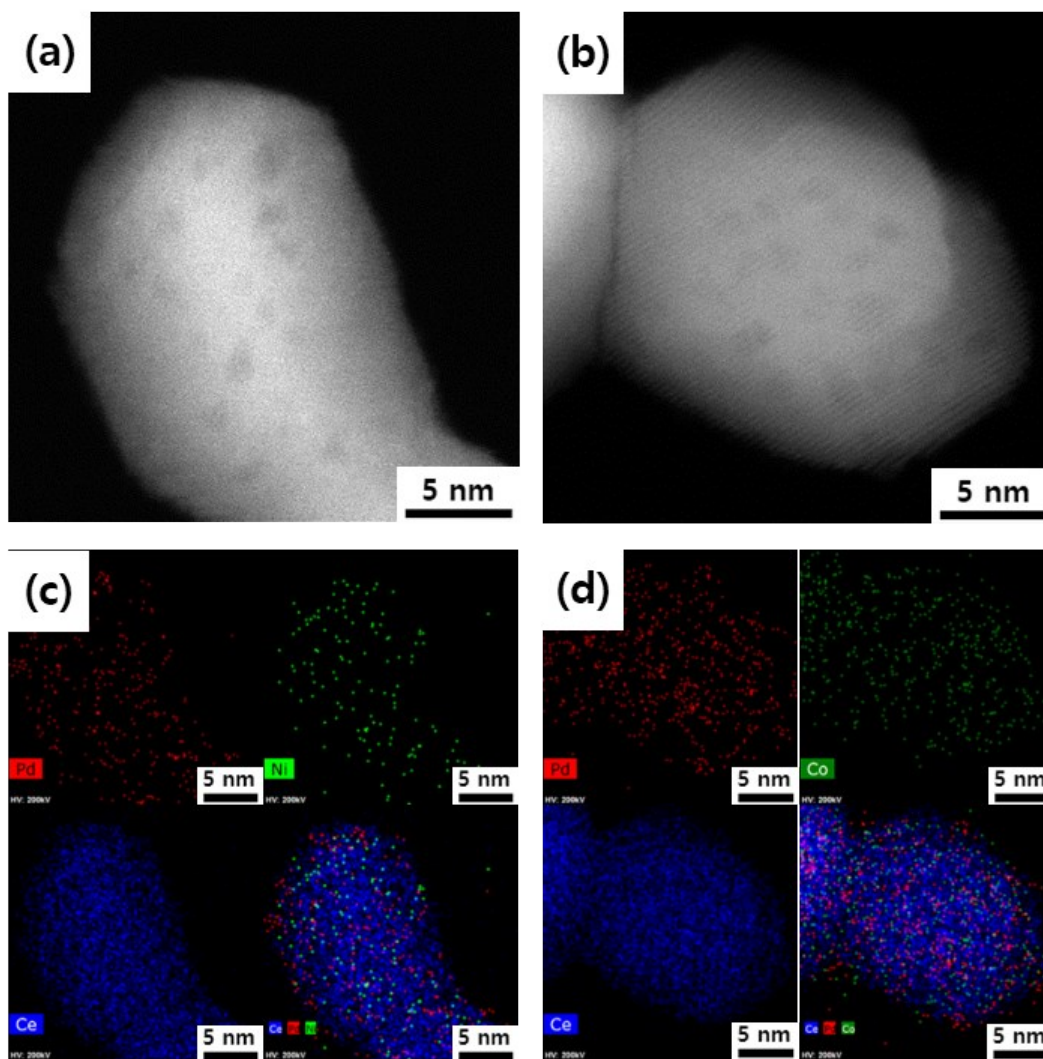

**Figure S2.** HAADF-STEM images of hydrothermally treated (a) PdNi/CeO<sub>2</sub> and (b) PdCo/CeO<sub>2</sub> catalysts, and EDS mapping images of hydrothermally treated (c) PdNi/CeO<sub>2</sub> and (d) PdCo/CeO<sub>2</sub> catalysts.

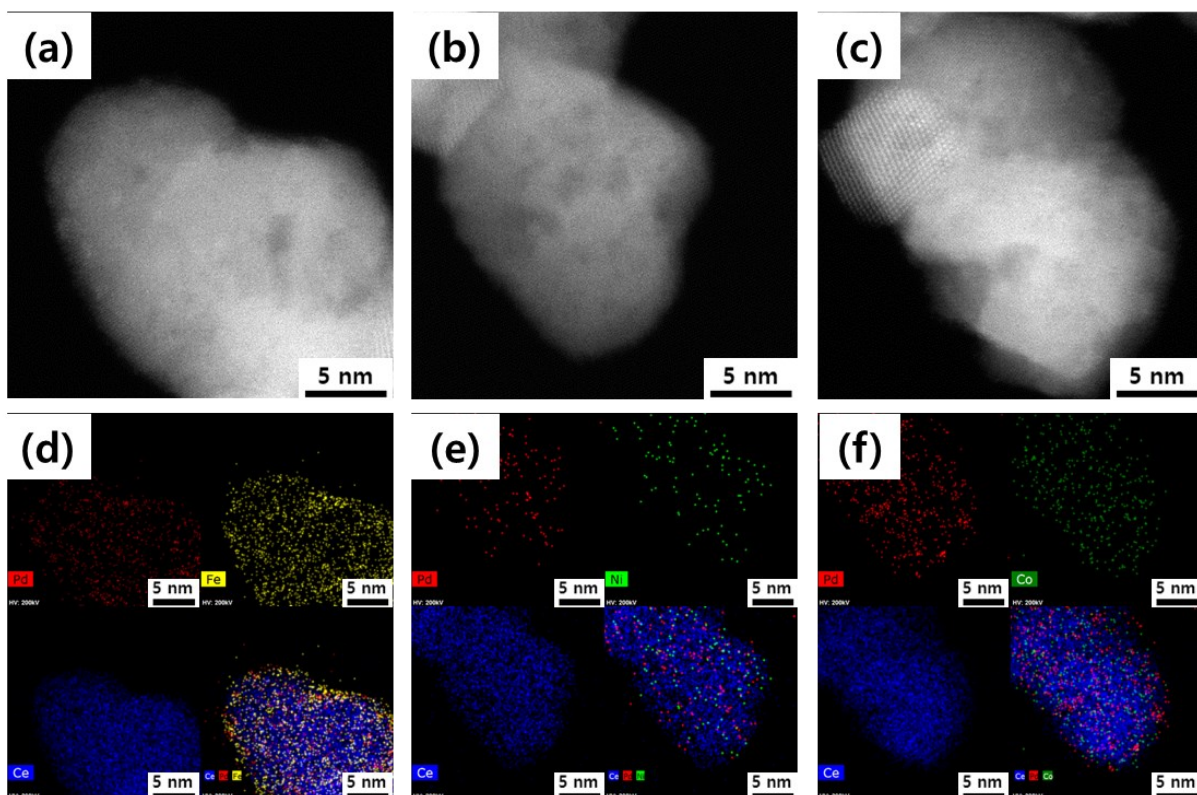

**Figure S3.** HAADF-STEM images of as-made (a) PdFe/CeO<sub>2</sub>, (b) PdNi/CeO<sub>2</sub>, and (c) PdCo/CeO<sub>2</sub> catalysts. EDS mapping images of as-made (d) PdFe/CeO<sub>2</sub>, (e) PdNi/CeO<sub>2</sub>, and (f) PdCo/CeO<sub>2</sub> catalysts.

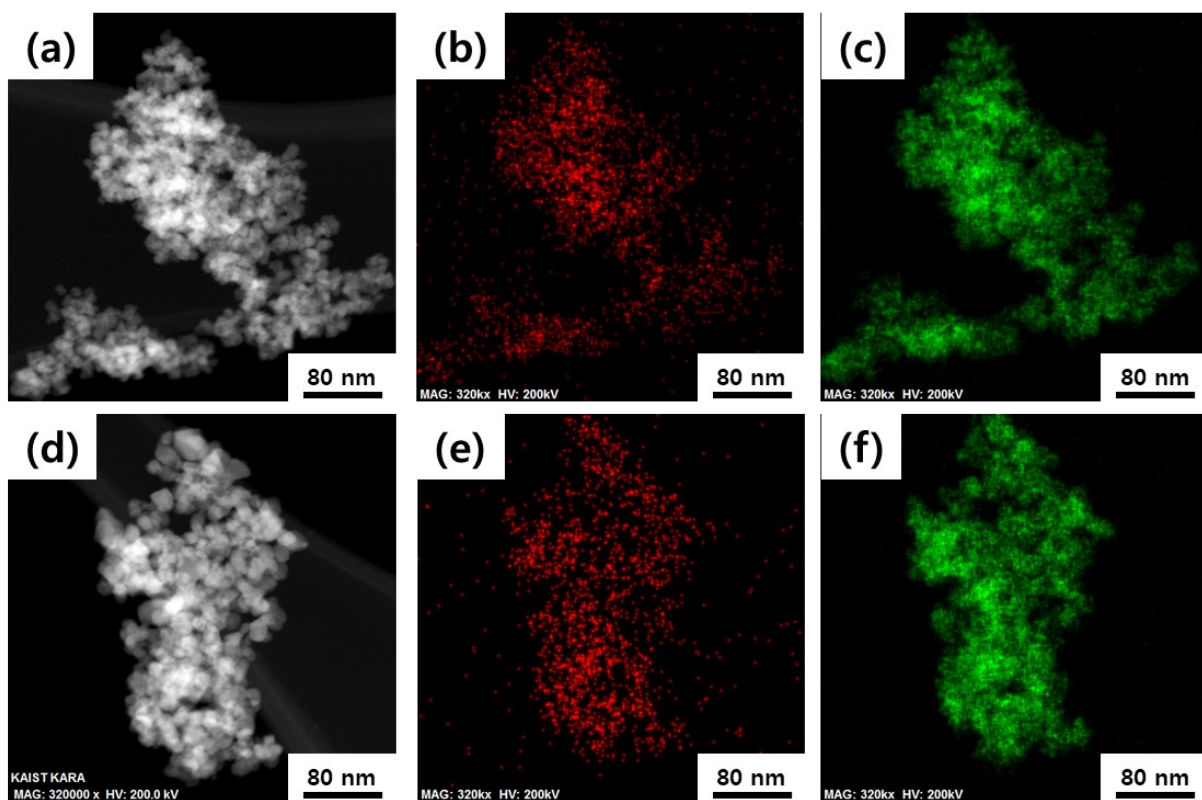

**Figure S4.** HAADF-STEM images of (a) as-made and (d) hydrothermally treated Pd/CeO<sub>2</sub> catalysts. EDS mapping images of (b, c) as-made and (e, f) hydrothermally treated Pd/CeO<sub>2</sub> catalysts (red: Pd, green: Ce).

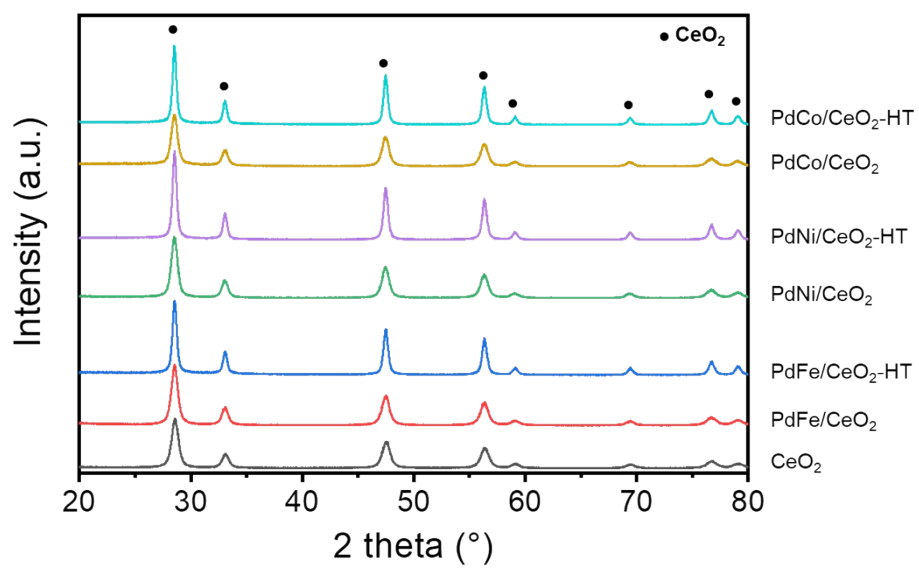

**Figure S5.** XRD results of as-made and hydrothermally treated Pd based bimetallic catalysts using different transition metals.

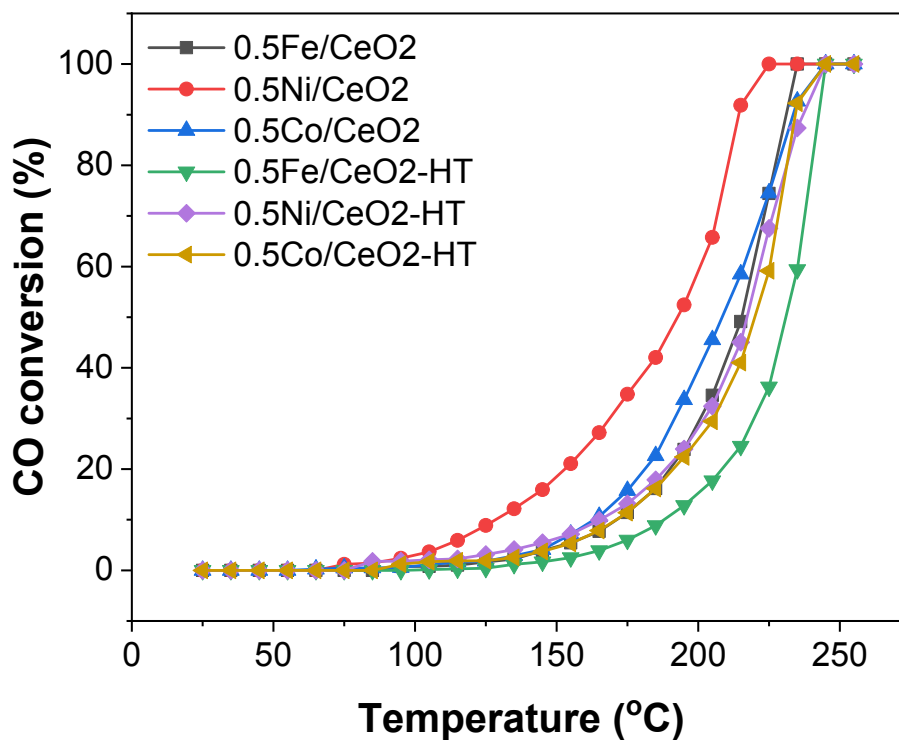

**Figure S6.** CO oxidation results using as-made and hydrothermally treated transition metal catalysts. (Reaction condition: 50 mg of catalyst, 120,000 ml/hr·g<sub>cat</sub>, 100 sccm of total feed flow, 1% CO, 1% O<sub>2</sub>, and 98% He)

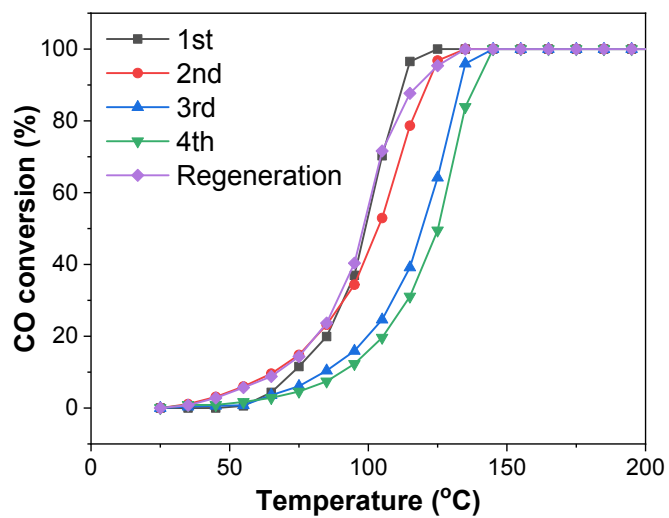

**Figure S7.** Repeatability and regeneration test using PdFe/CeO<sub>2</sub>-HT catalyst.



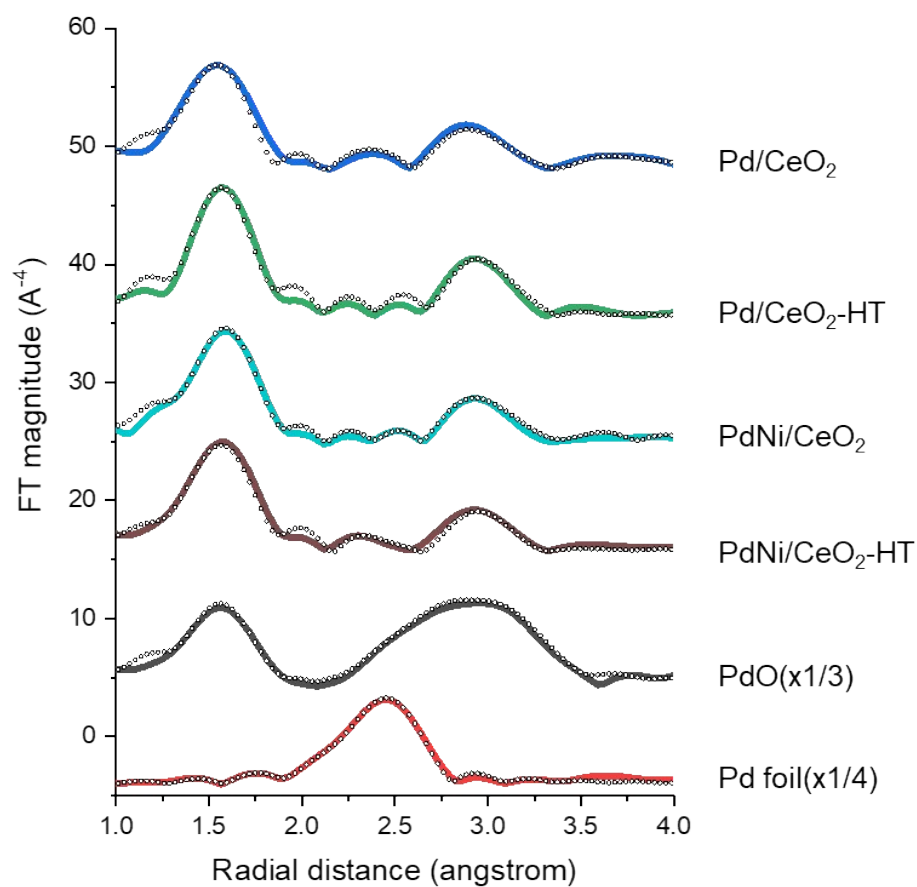

**Figure S8.** Pd K edge  $k^3$ -weighted Fourier transformed EXAFS spectra of PdNi/CeO<sub>2</sub>. The dots indicate fitted results, and lines indicate experimental data.

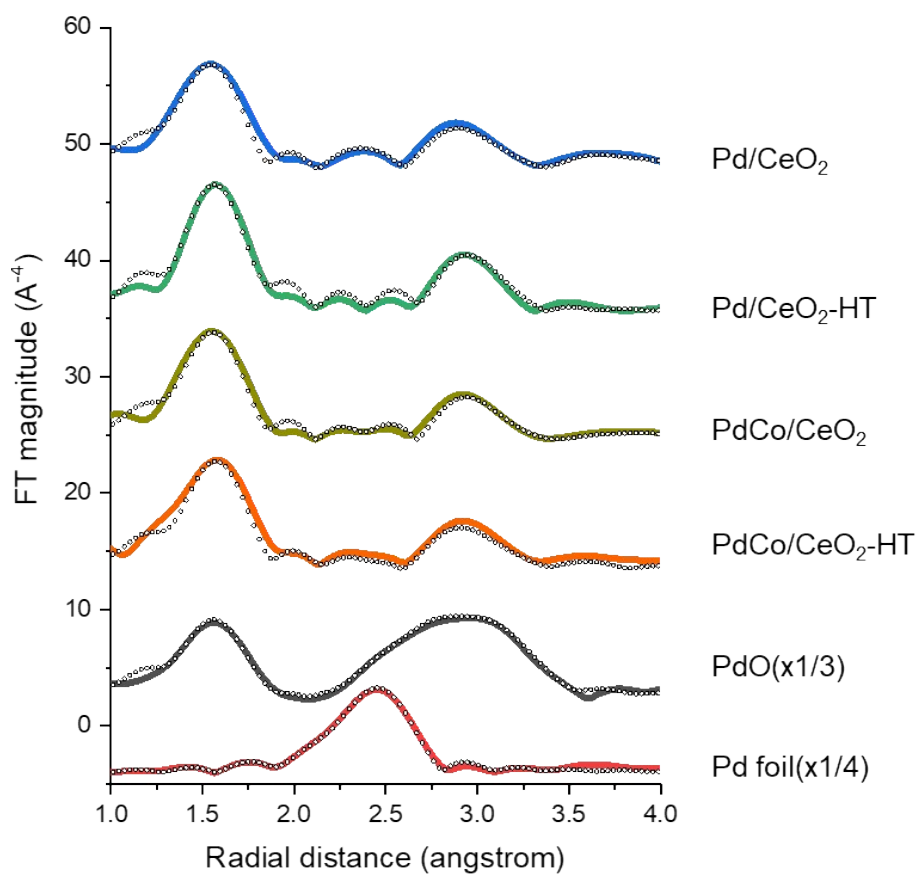

**Figure S9.** Pd K edge  $k^3$ -weighted Fourier transformed EXAFS spectra of PdCo/CeO<sub>2</sub>. The dots indicate fitted results, and lines indicate experimental data.

**Table S1.** EXAFS fitting data of as-made and hydrothermally treated PdNi/CeO<sub>2</sub> and PdCo/CeO<sub>2</sub> catalysts.

| Sample   | Path    | Coordination number (R) | Interatomic distance (Å) |
|----------|---------|-------------------------|--------------------------|
| Pd-Ni    | Pd-O    | 2.7±0.2                 | 2.01±0.03                |
|          | Pd-Ni   | 0.0±0.0                 | 2.59±0.02                |
|          | Pd-Pd   | 0.3±0.0                 | 2.74±0.02                |
|          | Pd-O-Ce | 1.7±0.2                 | 3.22±0.04                |
|          | Pd-O-Pd | 0.4±0.3                 | 3.48±0.03                |
| Pd-Ni HT | Pd-O    | 2.5±0.4                 | 1.99±0.03                |
|          | Pd-Ni   | 1.1±0.1                 | 2.59±0.02                |
|          | Pd-Pd   | 0.0±0.0                 | 2.74±0.01                |
|          | Pd-O-Ce | 1.9±0.3                 | 3.21±0.03                |
|          | Pd-O-Pd | 0.3±0.2                 | 3.49±0.03                |
| Pd-Co    | Pd-O    | 2.6±0.2                 | 1.99±0.03                |
|          | Pd-Co   | 0.0±0.0                 | 2.60±0.02                |
|          | Pd-Pd   | 0.1±0.0                 | 2.74±0.02                |
|          | Pd-O-Ce | 1.8±0.3                 | 3.22±0.04                |
|          | Pd-O-Pd | 0.3±0.2                 | 3.49±0.02                |
| Pd-Co HT | Pd-O    | 2.3±0.4                 | 1.99±0.02                |
|          | Pd-Co   | 0.9±0.2                 | 2.60±0.01                |
|          | Pd-Pd   | 0.0±0.0                 | 2.74±0.01                |
|          | Pd-O-Ce | 2.0±0.2                 | 3.21±0.02                |
|          | Pd-O-Pd | 0.4±0.2                 | 3.49±0.02                |

**Table S2.** Short summary of activity comparison ( $T_{50}$  and  $T_{100}$ ) with literature values for CO oxidation.  $T_{50}$  indicates the temperature at which the CO conversion reaches 50%, and  $T_{100}$  indicates the temperature at which the CO conversion reaches 100%.

| Entry | Catalyst                                               | Metal loading (%) | Reaction condition                                                          | $T_{50}$ (°C) | $T_{100}$ (°C) | Reference                                             |
|-------|--------------------------------------------------------|-------------------|-----------------------------------------------------------------------------|---------------|----------------|-------------------------------------------------------|
| 1     | PdFe/CeO <sub>2</sub> -HT                              | 0.5               | 1% CO, 1% O <sub>2</sub><br>SV = 120,000<br>mL/g <sub>cat</sub> ·h          | 100           | 125            | This study                                            |
| 2     | Pd/MgO                                                 | 2                 | 1% CO, 1% O <sub>2</sub><br>SV = 116,640<br>mL/g <sub>cat</sub> ·h          | 193           | 226            | Catalysis Communications, 2014, 46, 213–218           |
|       | Pd/TiO <sub>2</sub>                                    | 2                 |                                                                             | 295           | 318            |                                                       |
|       | Pd/SiO <sub>2</sub>                                    | 2                 |                                                                             | 275           | 317            |                                                       |
| 3     | PdO/Ce <sub>1-x</sub> Pd <sub>x</sub> O <sub>2-δ</sub> | 1.68              | 0.95 % CO,<br>1.75% O <sub>2</sub><br>SV = 12,000<br>mL/g <sub>cat</sub> ·h | 120           | 160            | J. Phys. Chem. C, 2011, 115, 19789–19796              |
|       | Ce <sub>1-x</sub> Pd <sub>x</sub> O <sub>2-δ</sub>     | 1.58              |                                                                             | 180           | 220            |                                                       |
|       | PdO/CeO <sub>2</sub>                                   | 0.2               |                                                                             | 185           | 220            |                                                       |
| 4     | Pd/CeO <sub>2</sub>                                    | 1                 | 0.45% CO, 10% O <sub>2</sub><br>GHSV = 480,000 h <sup>-1</sup>              | 97            | 150            | Appl. Catal. B: Environmental, 2013, 132–133, 511–518 |
|       | Pd/TiO <sub>2</sub>                                    | 1                 |                                                                             | 121           | >200           |                                                       |
|       | Pd/Al <sub>2</sub> O <sub>3</sub>                      | 1                 |                                                                             | 143           | 160            |                                                       |
| 5     | P-Pd/SBA-15                                            | 2                 | 1% CO, 20% O <sub>2</sub><br>SV = 24,000<br>mL/g <sub>cat</sub> ·h          | 201           | 206            | Appl. Catal. B: Environmental, 2011, 106, 672–680     |
|       | H-Pd/SBA-15-1%                                         | 1                 |                                                                             | 138           | 140            |                                                       |
|       | H-Pd/SBA-15-2%                                         | 2                 |                                                                             | 133           | 135            |                                                       |
|       | H-Pd/SBA-15-5%                                         | 5                 |                                                                             | 120           | 127            |                                                       |
| 6     | Pd/Al <sub>2</sub> O <sub>3</sub>                      | 2.5               | 1.9% CO, 1.3% O <sub>2</sub><br>SV = 232,500<br>mL/g <sub>cat</sub> ·h      | 217           | -              | ACS Catal. 2013, 3, 846–855                           |
|       | Pd/La-Al <sub>2</sub> O <sub>3</sub>                   |                   |                                                                             | 197           | -              |                                                       |
